# Supplementary material
Source: PubMed Central journal article supplement (PMC2975902)

SUPPLEMENTARY DATA

Table 1: Primers used for Real Time PCR

|                  |           |                      |
|------------------|-----------|----------------------|
| CDX2             | sense     | GCCTGTCACCAGAGCTTCTC |
|                  | antisense | AGACCAACAACCCAAACAGC |
| $\beta$ actin    | sense     | ACTGGAACGGTGAAGGTGAC |
|                  | antisense | GTGGACTTGGGAGAGGACTG |
| Rps 11           | sense     | GCCGAGACTATCTGCACTAC |
|                  | antisense | ATGTCCAGCCTCAGAACTTC |
| $\alpha$ tubulin | sense     | GCCTGGACCACAAGTTTGAC |
|                  | antisense | TGAAATTCTGGGAGCATGAC |

Table 2: Correlation between *in vitro* and *ex vivo* findings

|          | IEC lines + LPL <i>in vitro</i> |     |            |     |     |      | <i>ex vivo</i> studies (crypt staining) |     |            |     |     |      |
|----------|---------------------------------|-----|------------|-----|-----|------|-----------------------------------------|-----|------------|-----|-----|------|
|          | IAP                             | Akt | ERK<br>1/2 | p38 | JNK | CDX2 | IAP                                     | Akt | ERK<br>1/2 | p38 | JNK | CDX2 |
| Nor      | +                               | +   | +          | +   | +   | +    | -                                       | -   | -          | -   | -   | -    |
| Inact CD | +++                             | +   | ++         | ++  | ++  | ++   | ++                                      | ++  | -          | +   | +   | +    |
| Act CD   | ND                              | ND  | ND         | ND  | ND  | ND   | +++                                     | +++ | +          | +++ | +   | +    |
| Inact UC | ND                              | +   | ++         | +   | ++  | ND   | -                                       | ++  | ++         | -   | +   | +    |
| Act UC   | ND                              | ND  | ND         | ND  | ND  | ND   | -                                       | +   | ++         | -   | +   | +    |

ND = Not Determined.

#### Supplementary figure legends

Figure 1: MAPK pathway activation in T84 cells co-cultured with LPL. Immunoblotting for P-ERK1/2, P-p38 MAPK, P-JNK, and ERK2 in lysates obtained from T84 cells co-cultured with freshly isolated Nor, CD or UC LPL for 30 min to 3 hours. The CTL lane contains T84 alone. EGF (10 nM; 15min) was used as a positive control. These data are representative of 3 experiments. The percentage of MAPK activity related to the activity induced by EGF was quantified after densitometric analysis.

Figure 2: Nor, inactive and active CD, and inactive and active UC colonic tissue sections were immunostained using anti-phospho ERK1/2, anti-phospho p38 MAPK, and anti-phospho JNK antibodies. The slides were counter-stained with Mayer's Hematoxylin solution, and examined with a Zeiss Axioskop Light Microscope at 20X magnification. The insets represent 100X magnification of the crypt epithelial cells to document nuclear localization. These data are representative of 4 experiments.

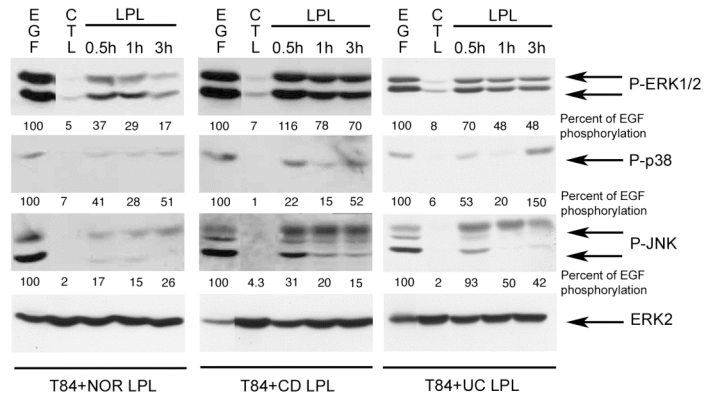

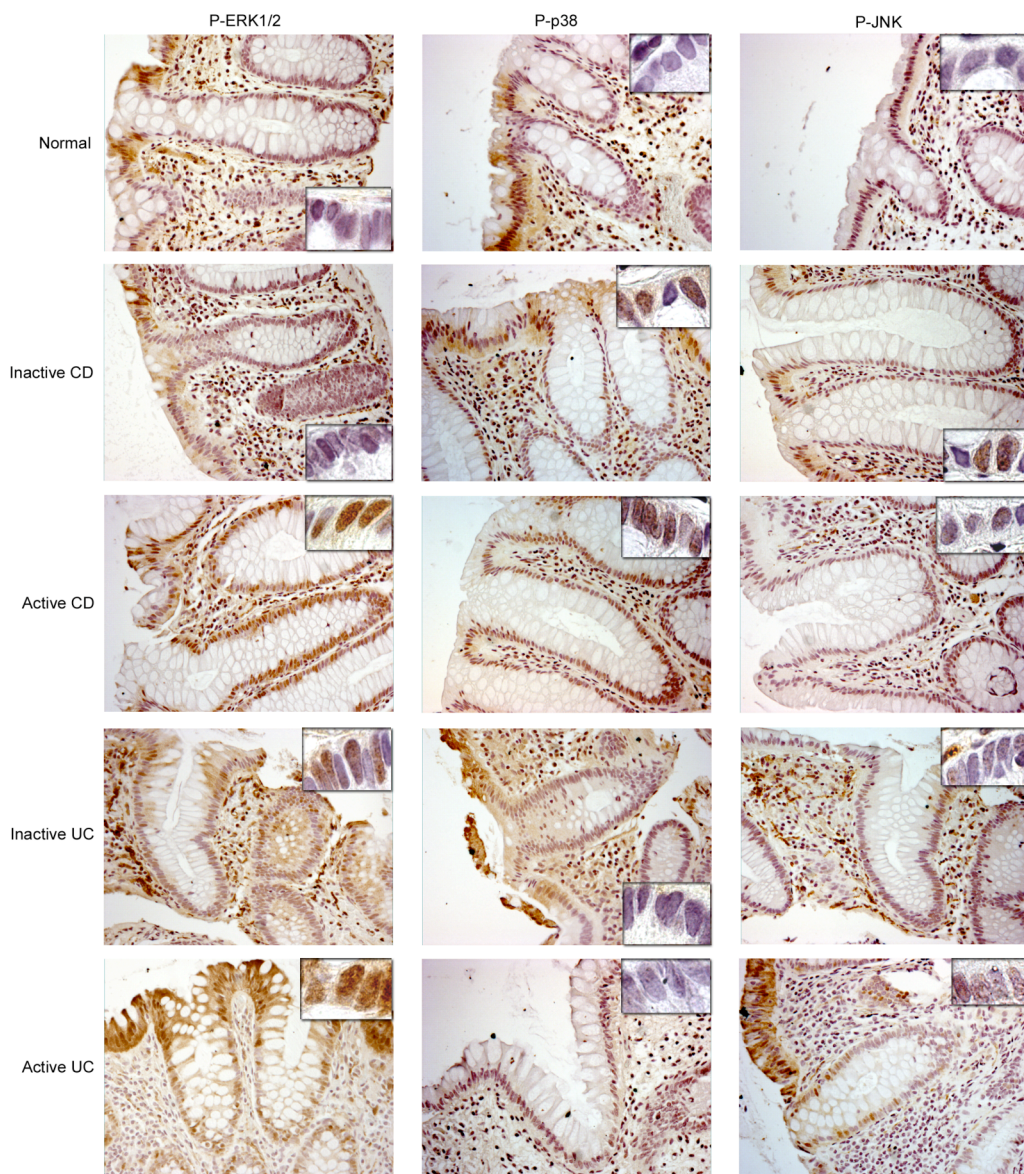

Supplement: NIHMS36874-supplement-01.pdf [file NIHMS36874-supplement-01.pdf]
